# Supplementary material for: Altered sensory-weighting mechanisms is observed in adolescents with idiopathic scoliosis
Source: Springer Nature journal article supplement (doi:10.1186/1471-2202-7-68), 2006-10-19

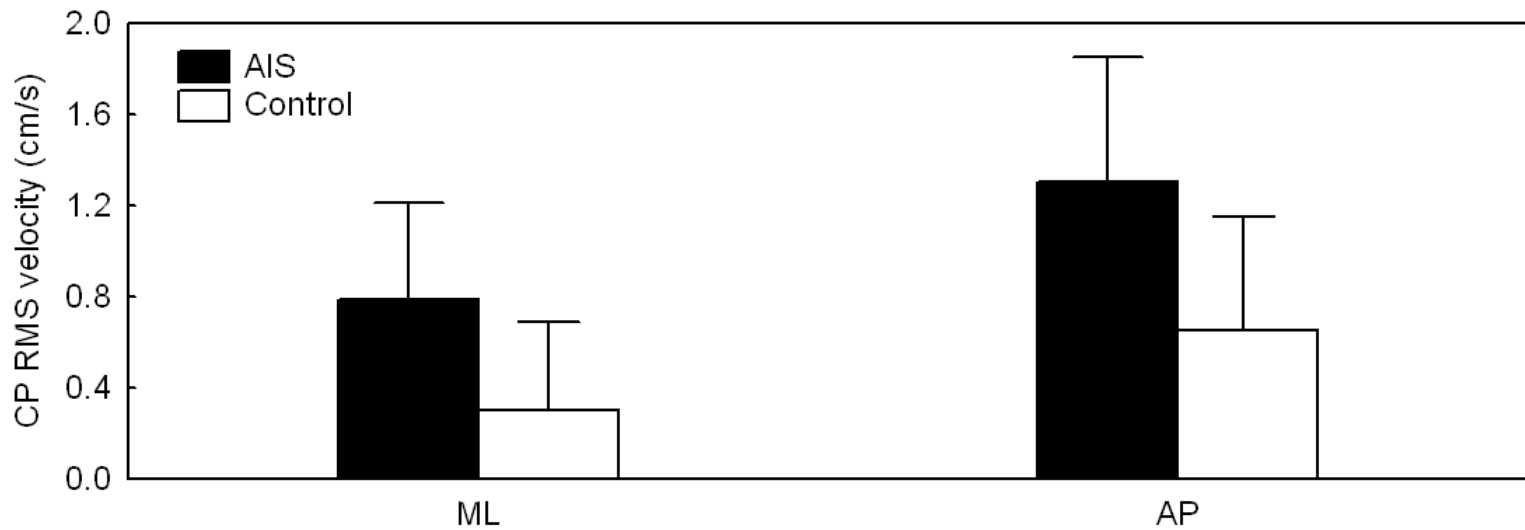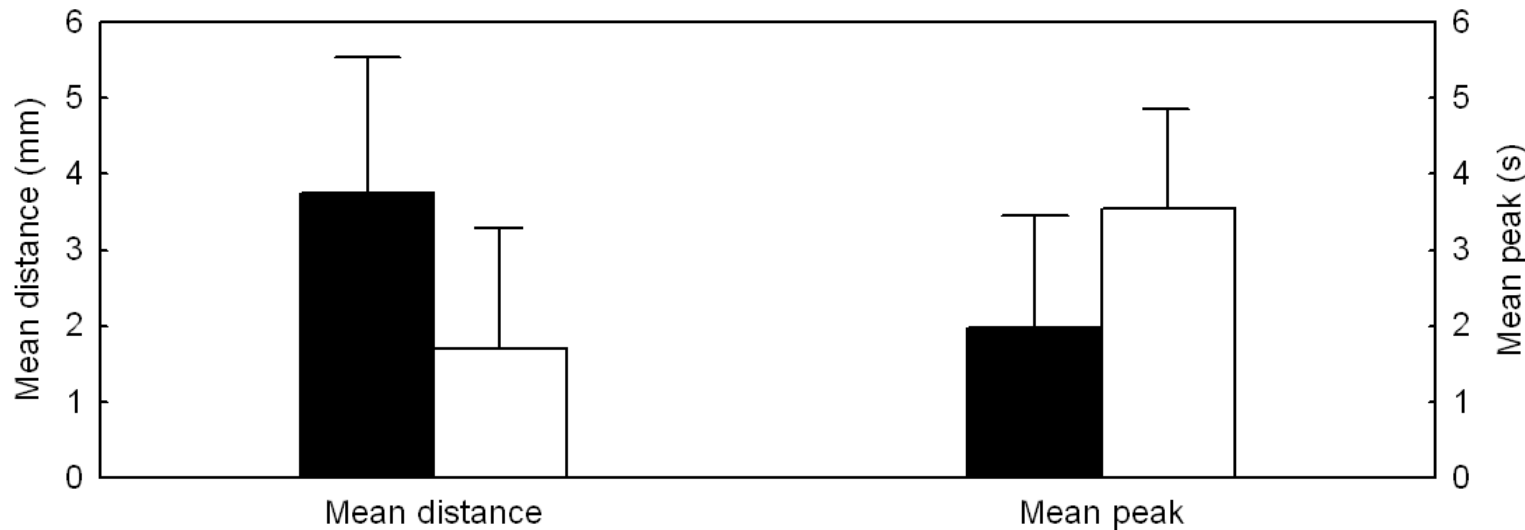

Supplement: 12868_2006_273_MOESM2_ESM.pdf [file 12868_2006_273_MOESM2_ESM.pdf]
